# Supplementary material
Source: ML conference proceedings conference paper supplement (https://openreview.net/forum?id=G8nal7MpIQ)

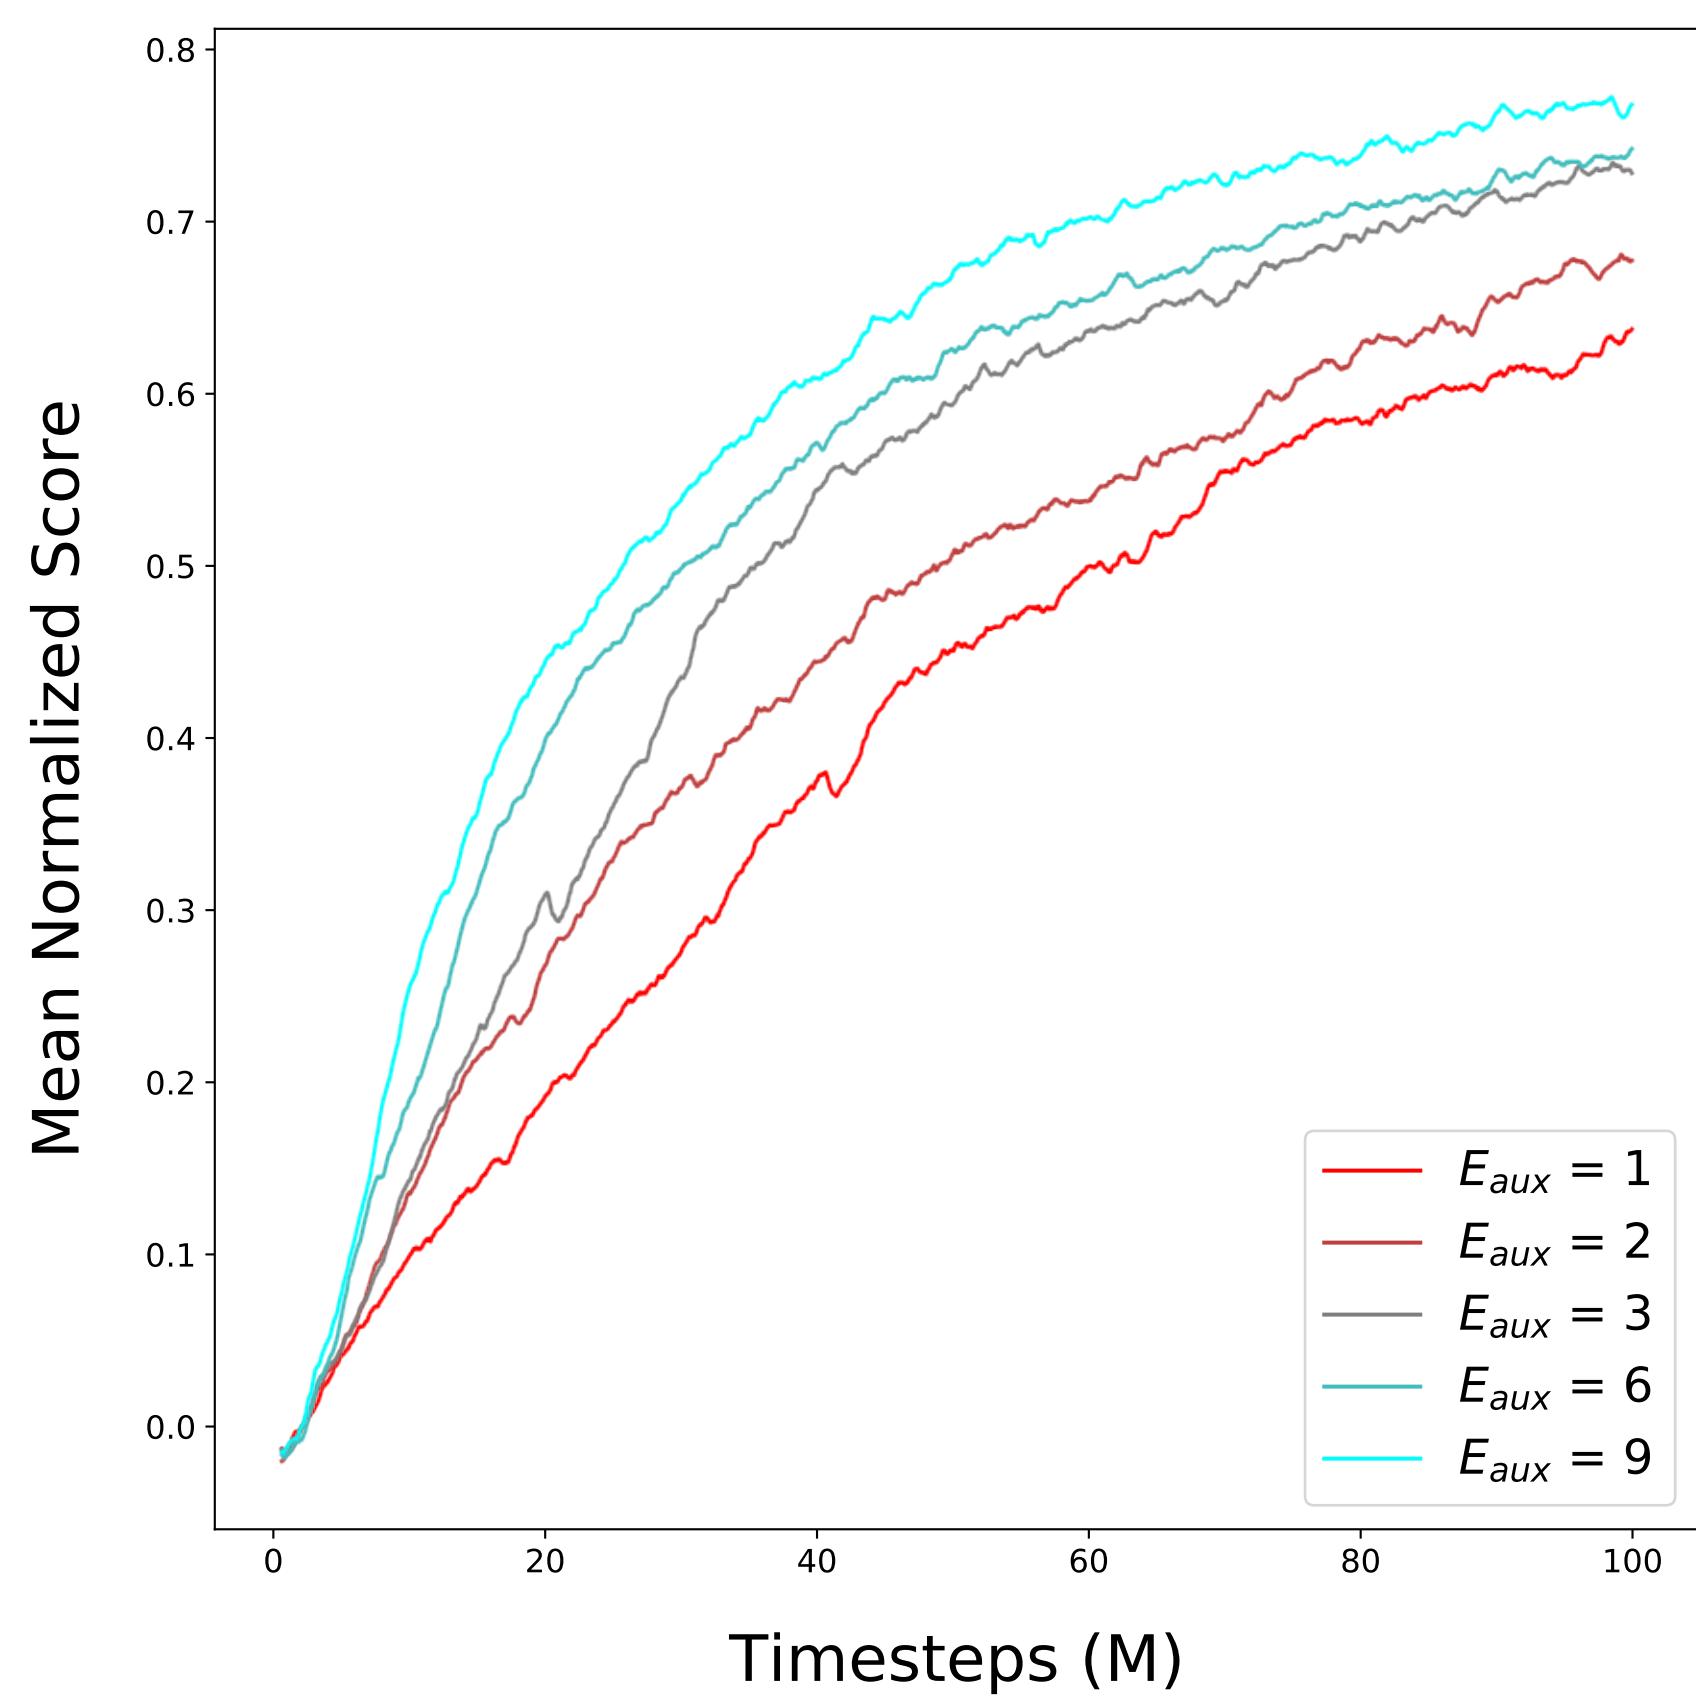

Supplement: supplementary_material [file attachment]

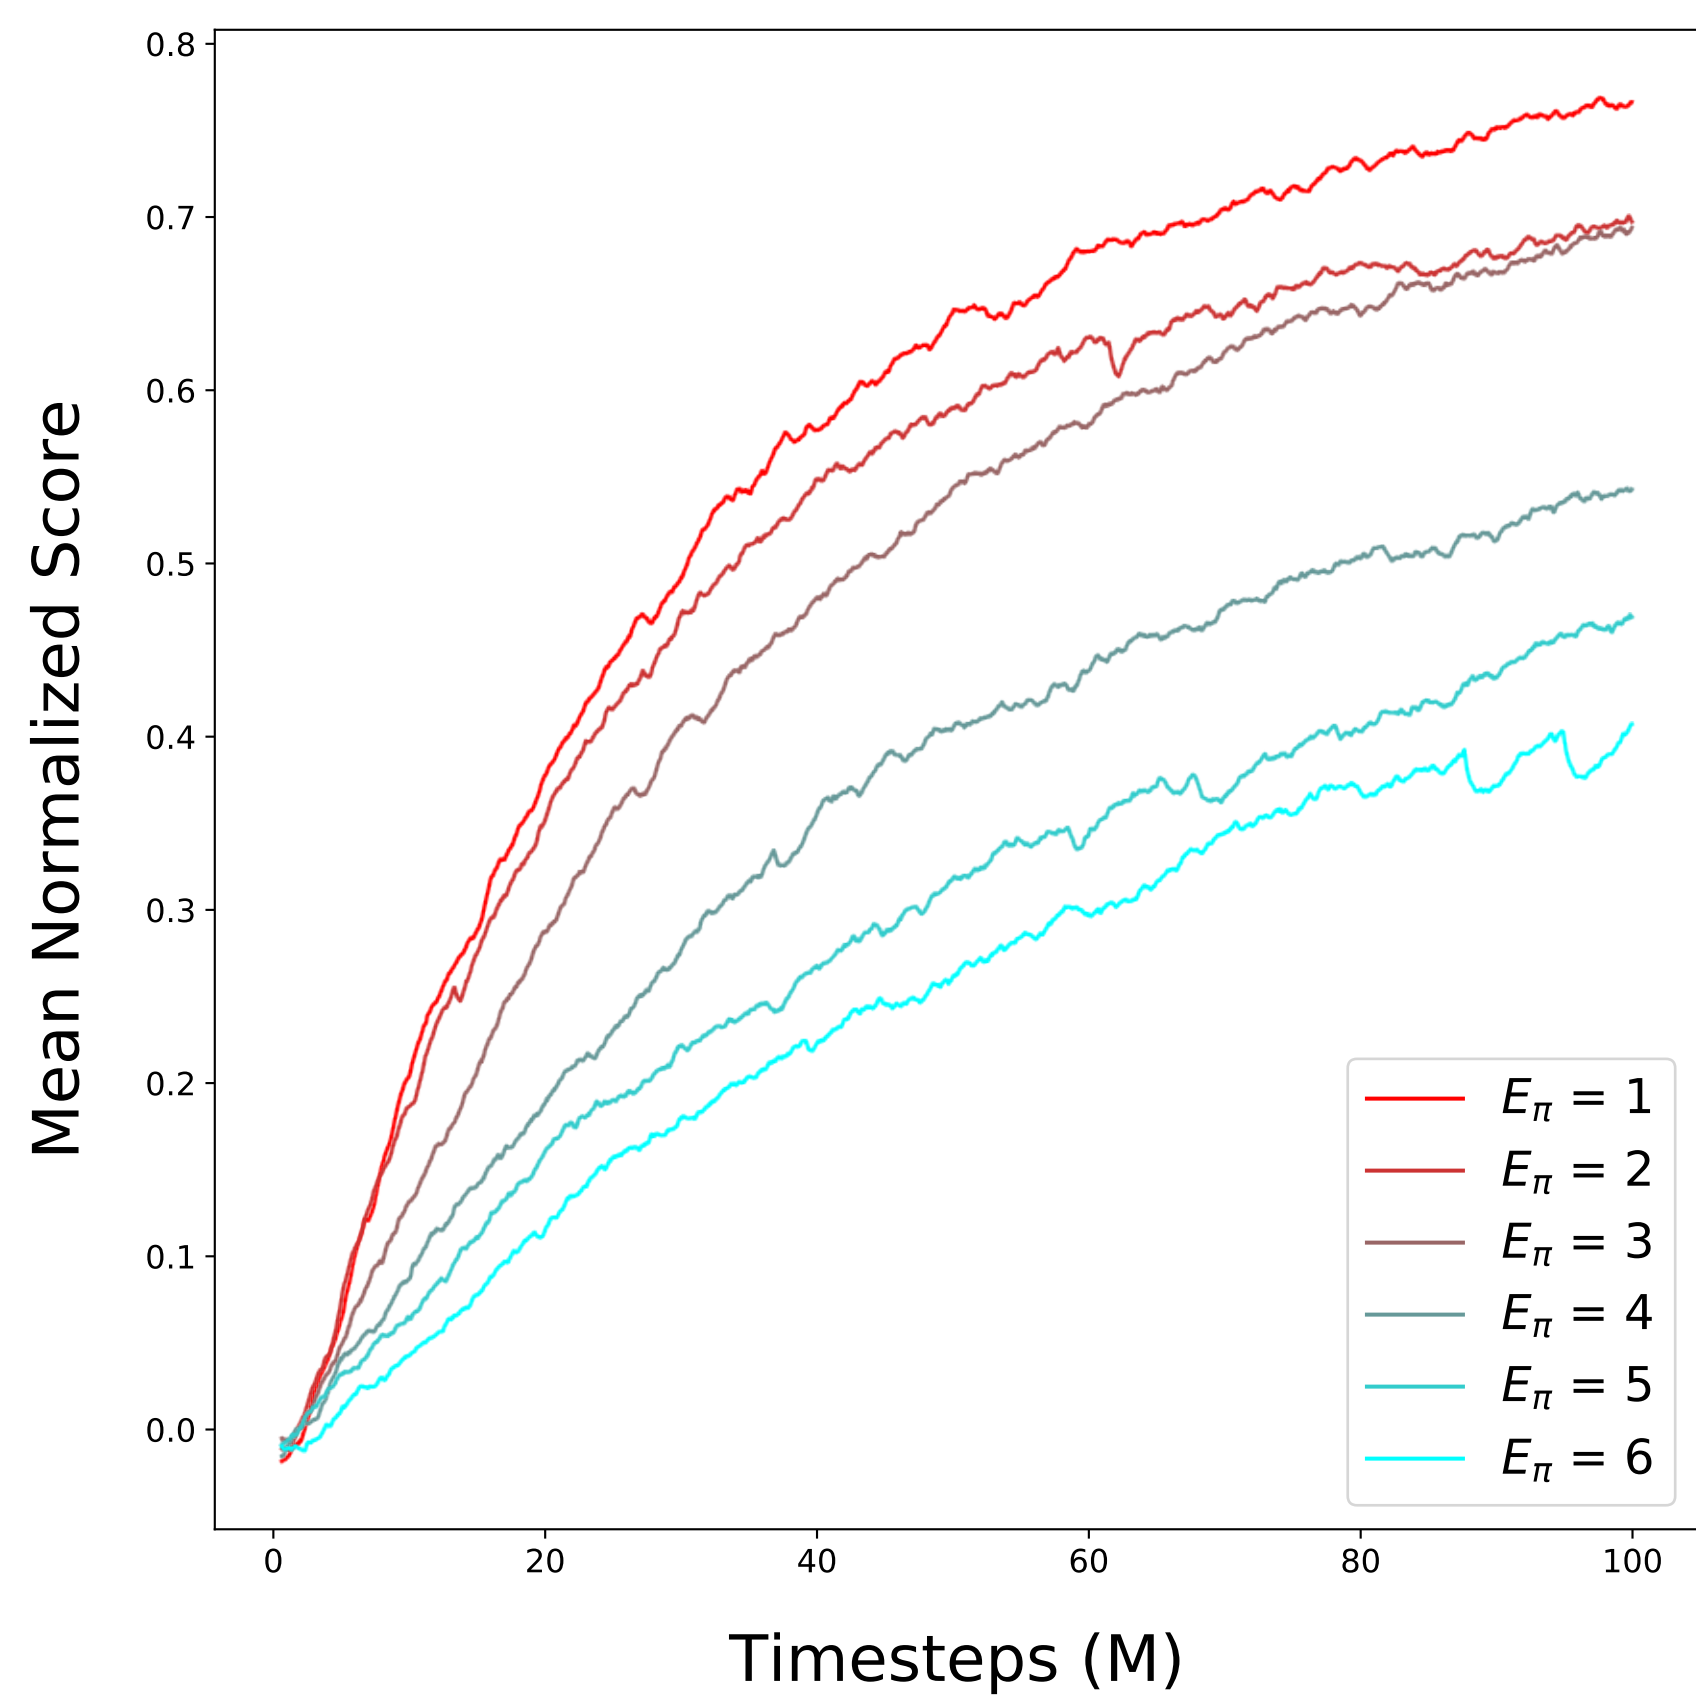

Supplement: supplementary_material [file attachment]

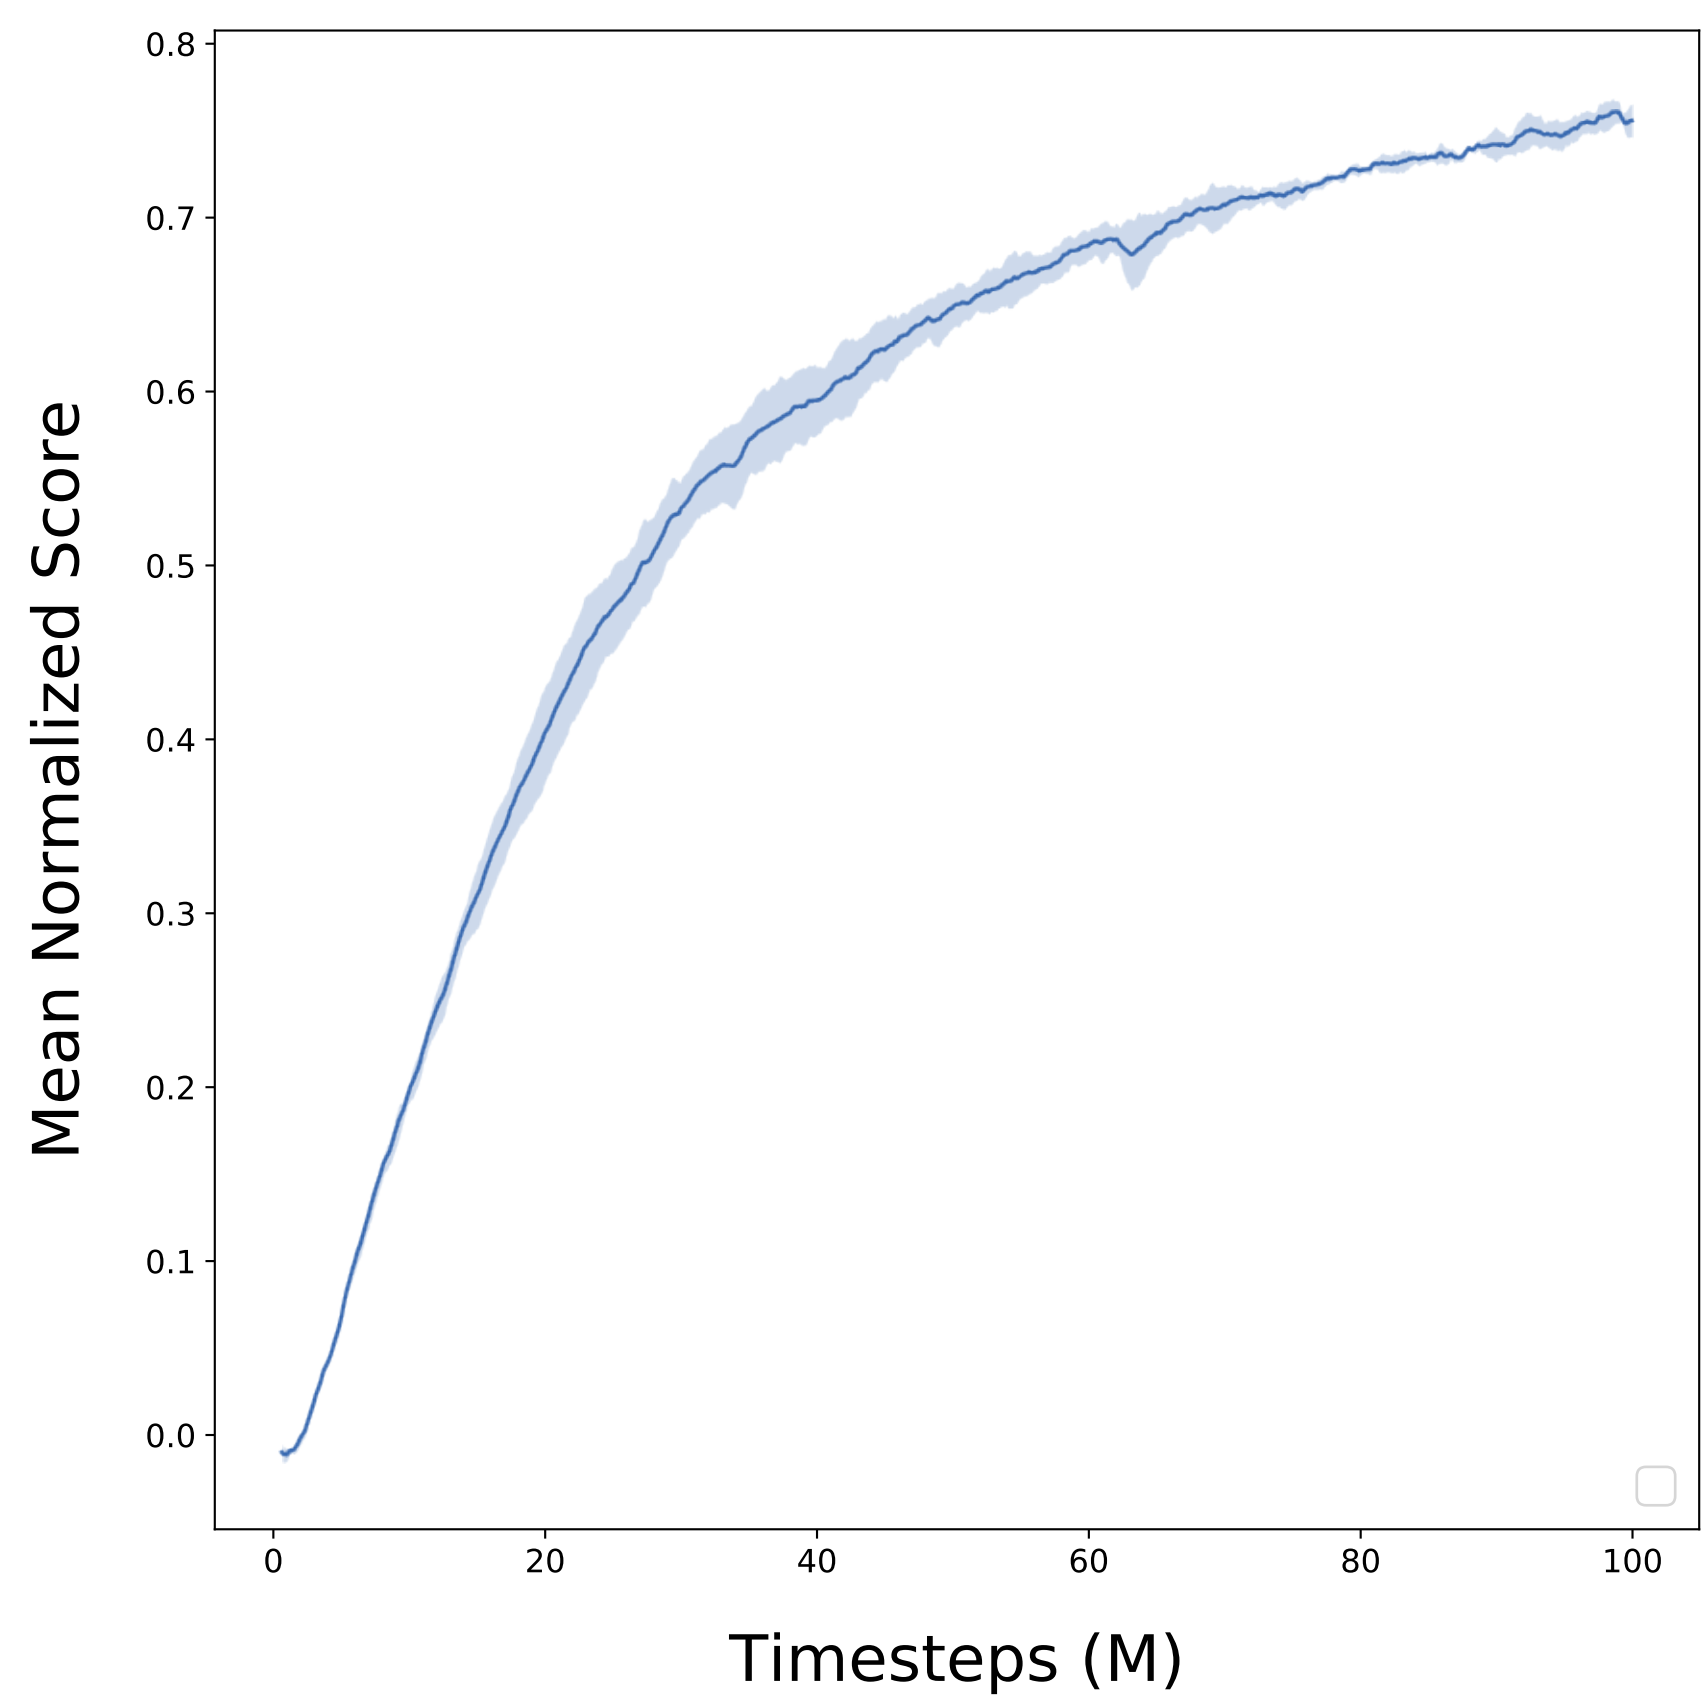

Supplement: supplementary_material [file attachment]

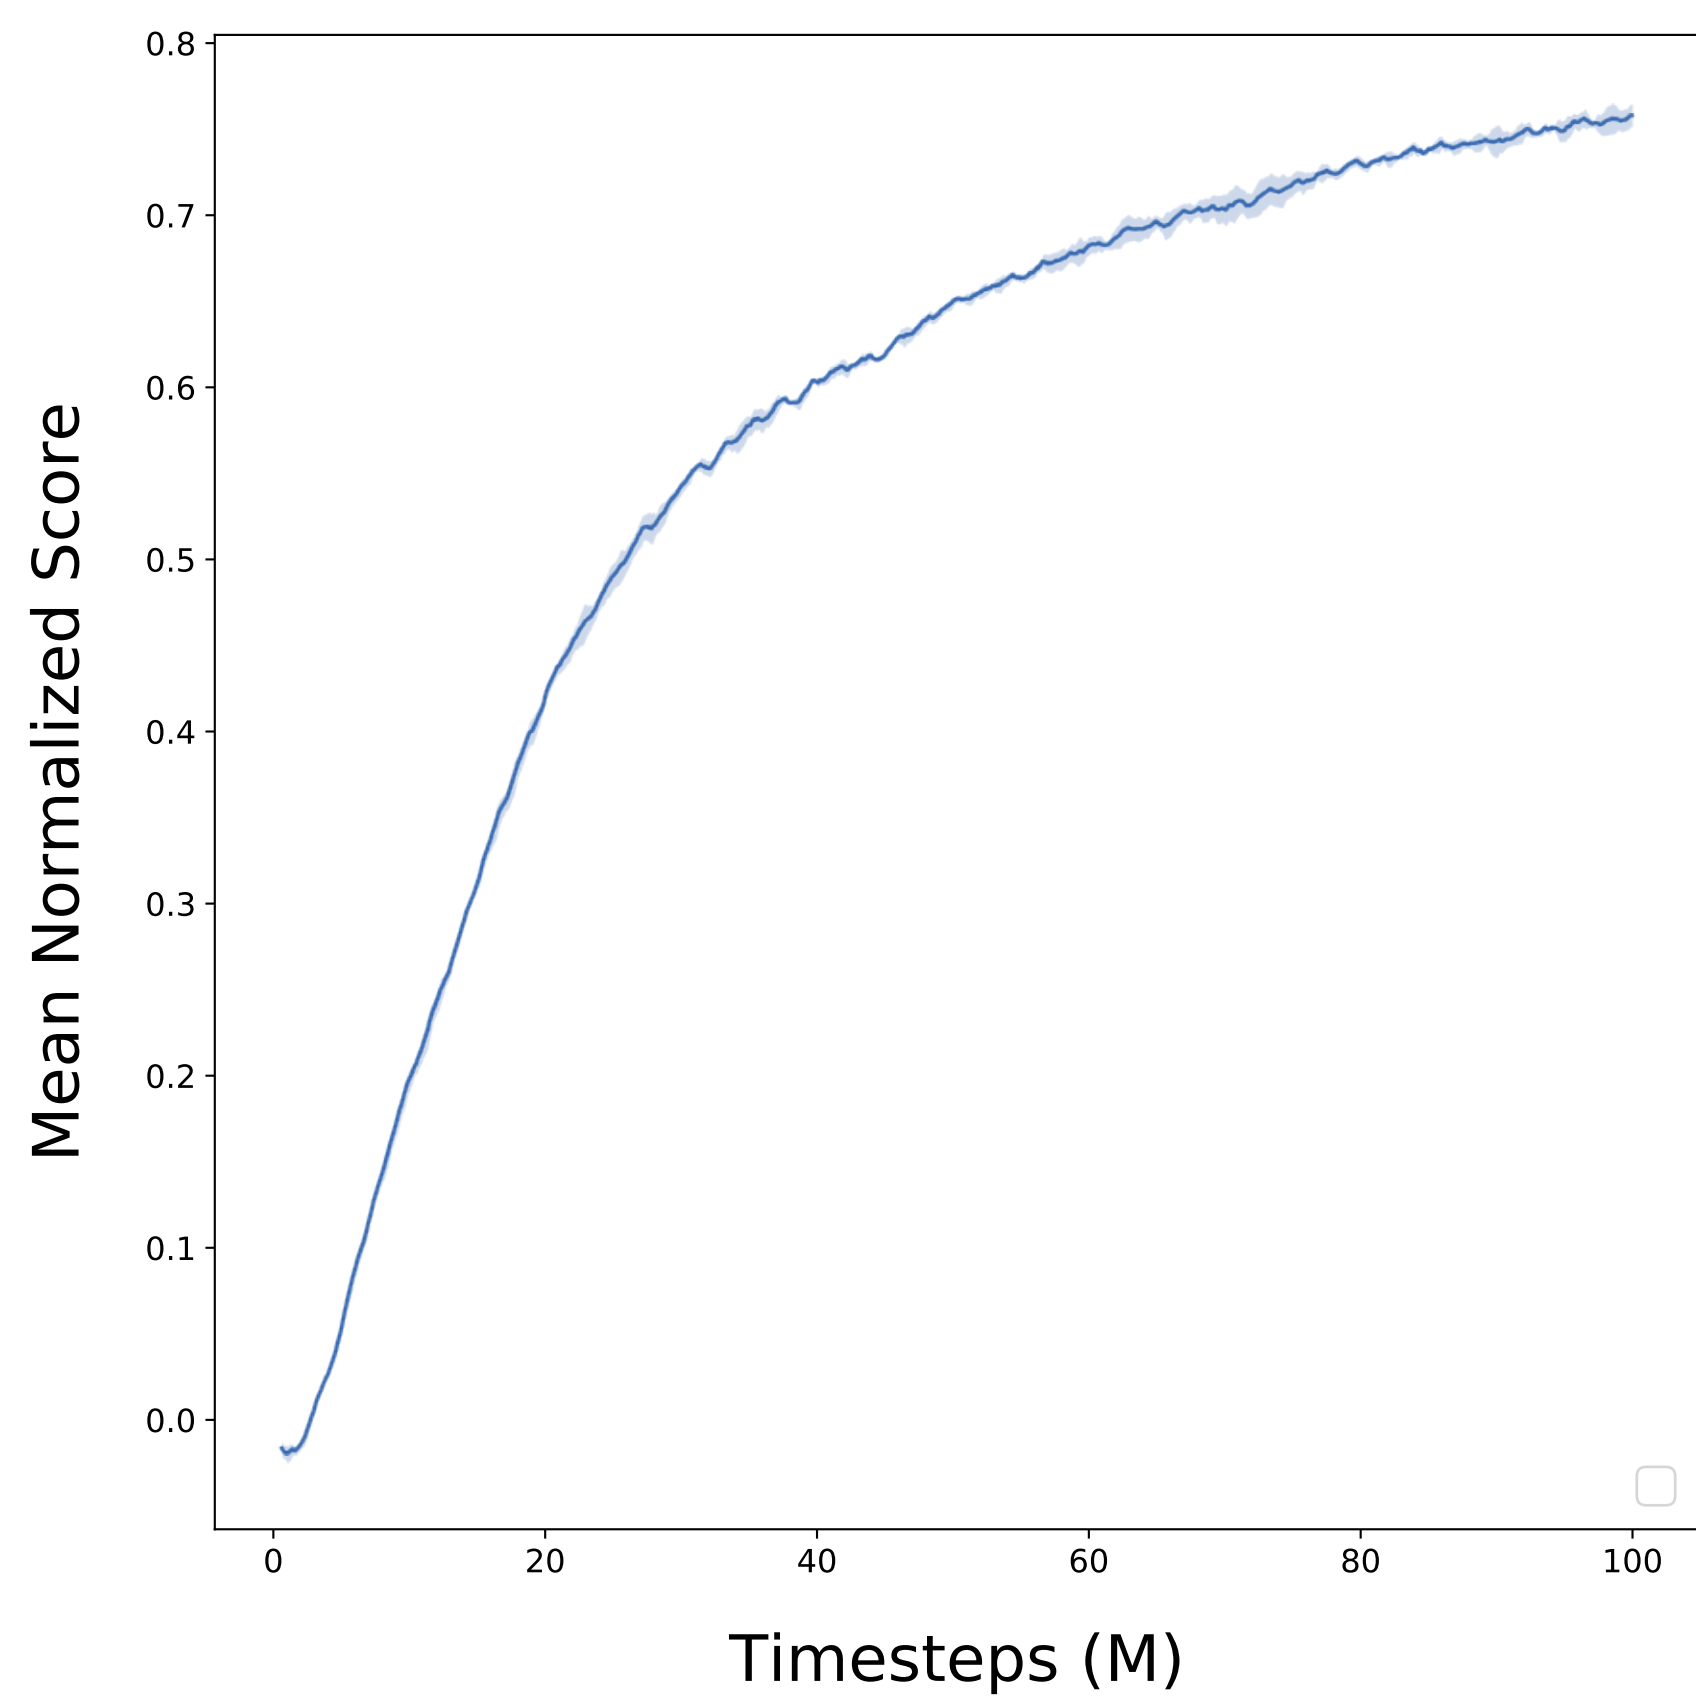

Supplement: supplementary_material [file attachment]

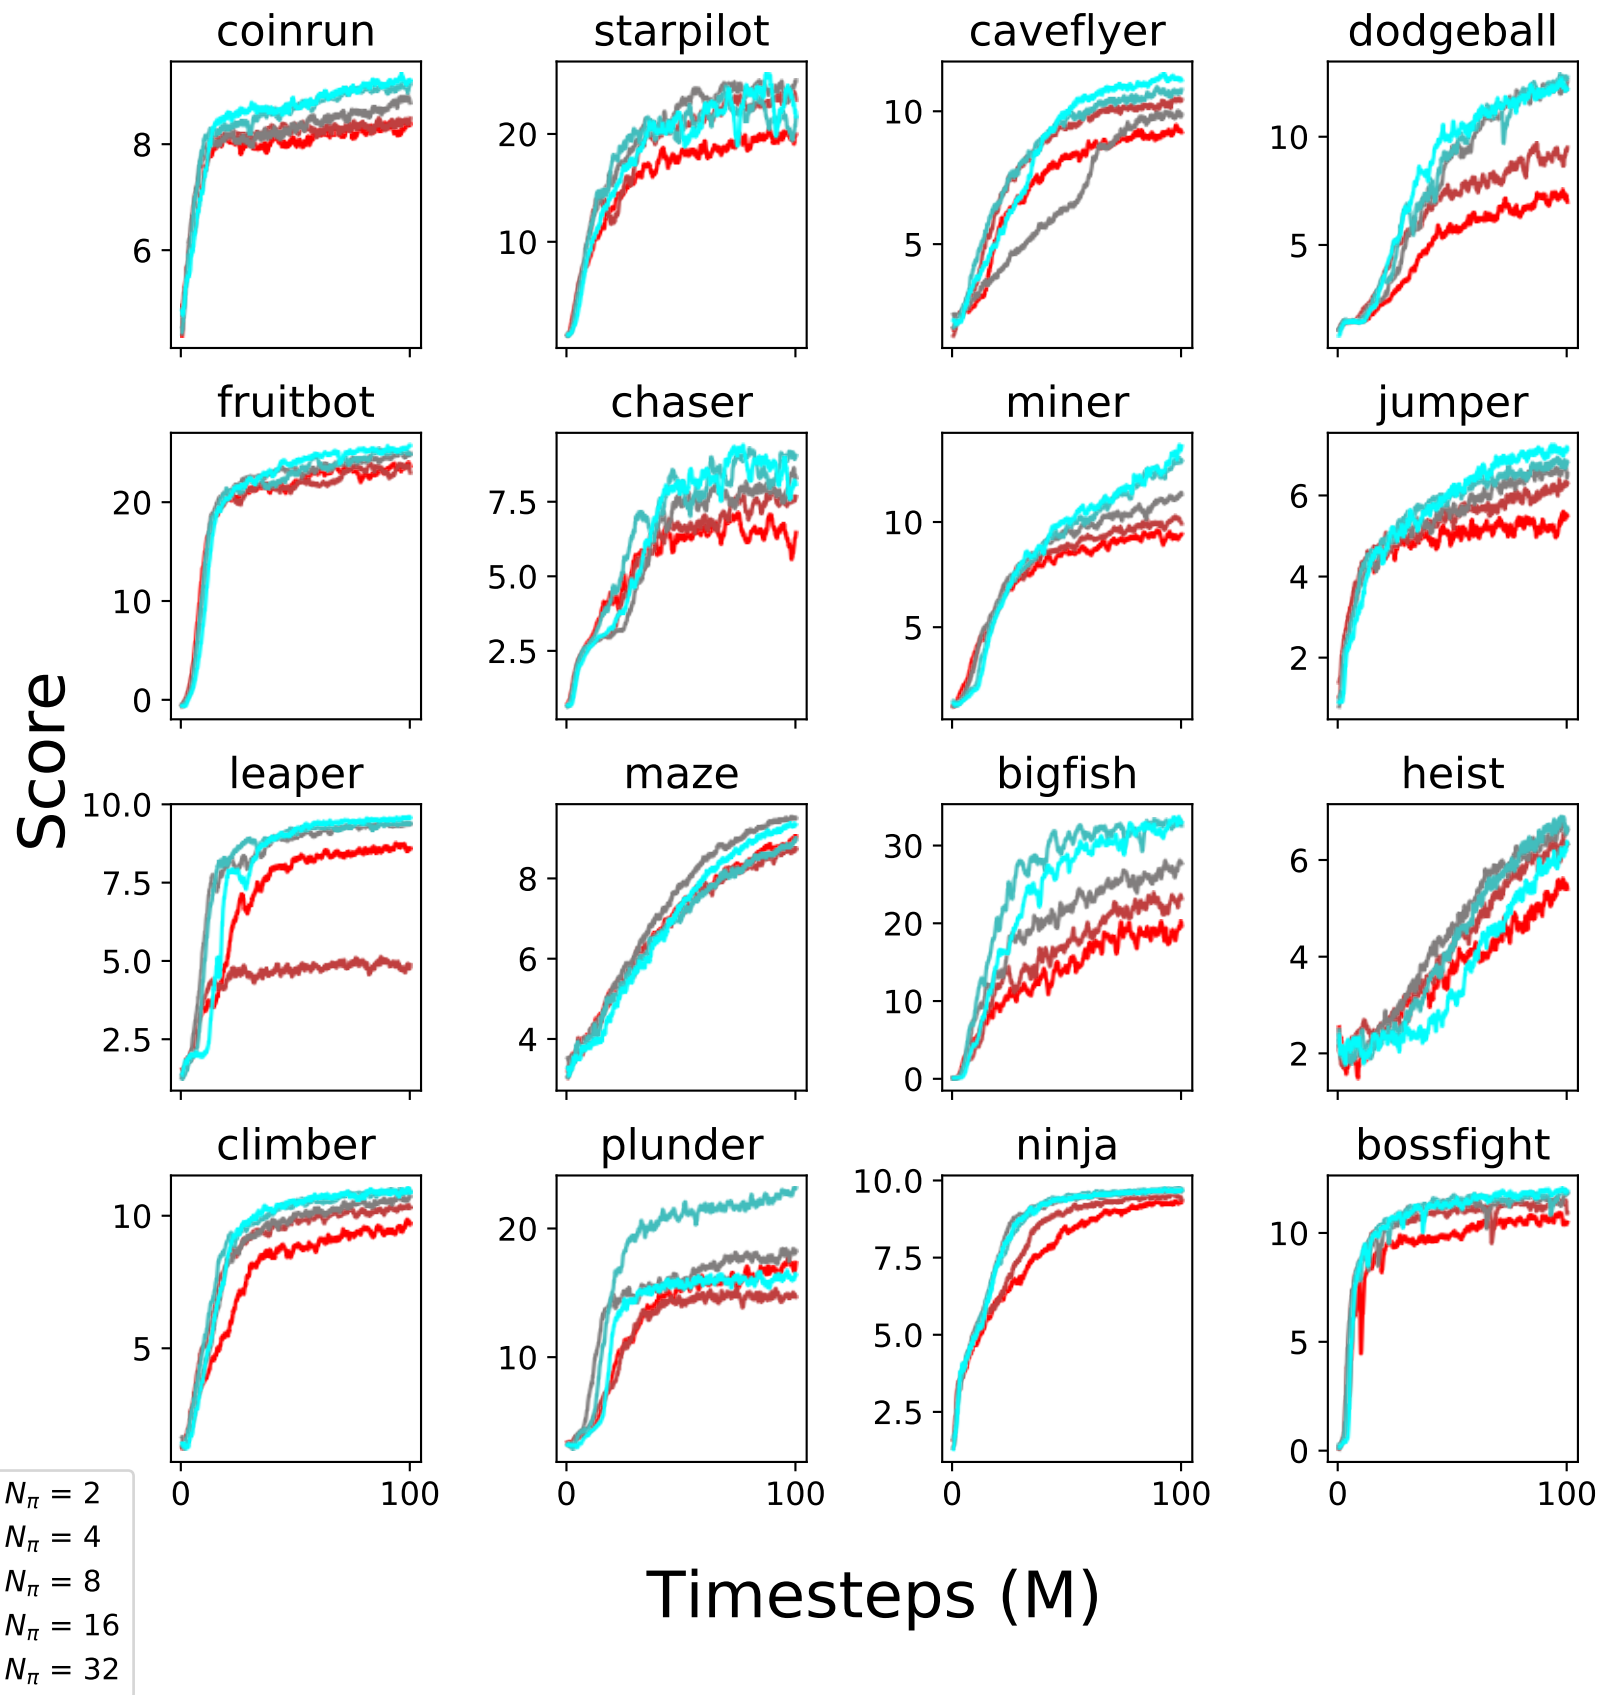

Supplement: supplementary_material [file attachment]

Mean Normalized Score

0.6  
0.5  
0.4  
0.3  
0.2  
0.1  
0.0

0

20

40

60

80

100

Timesteps (M)

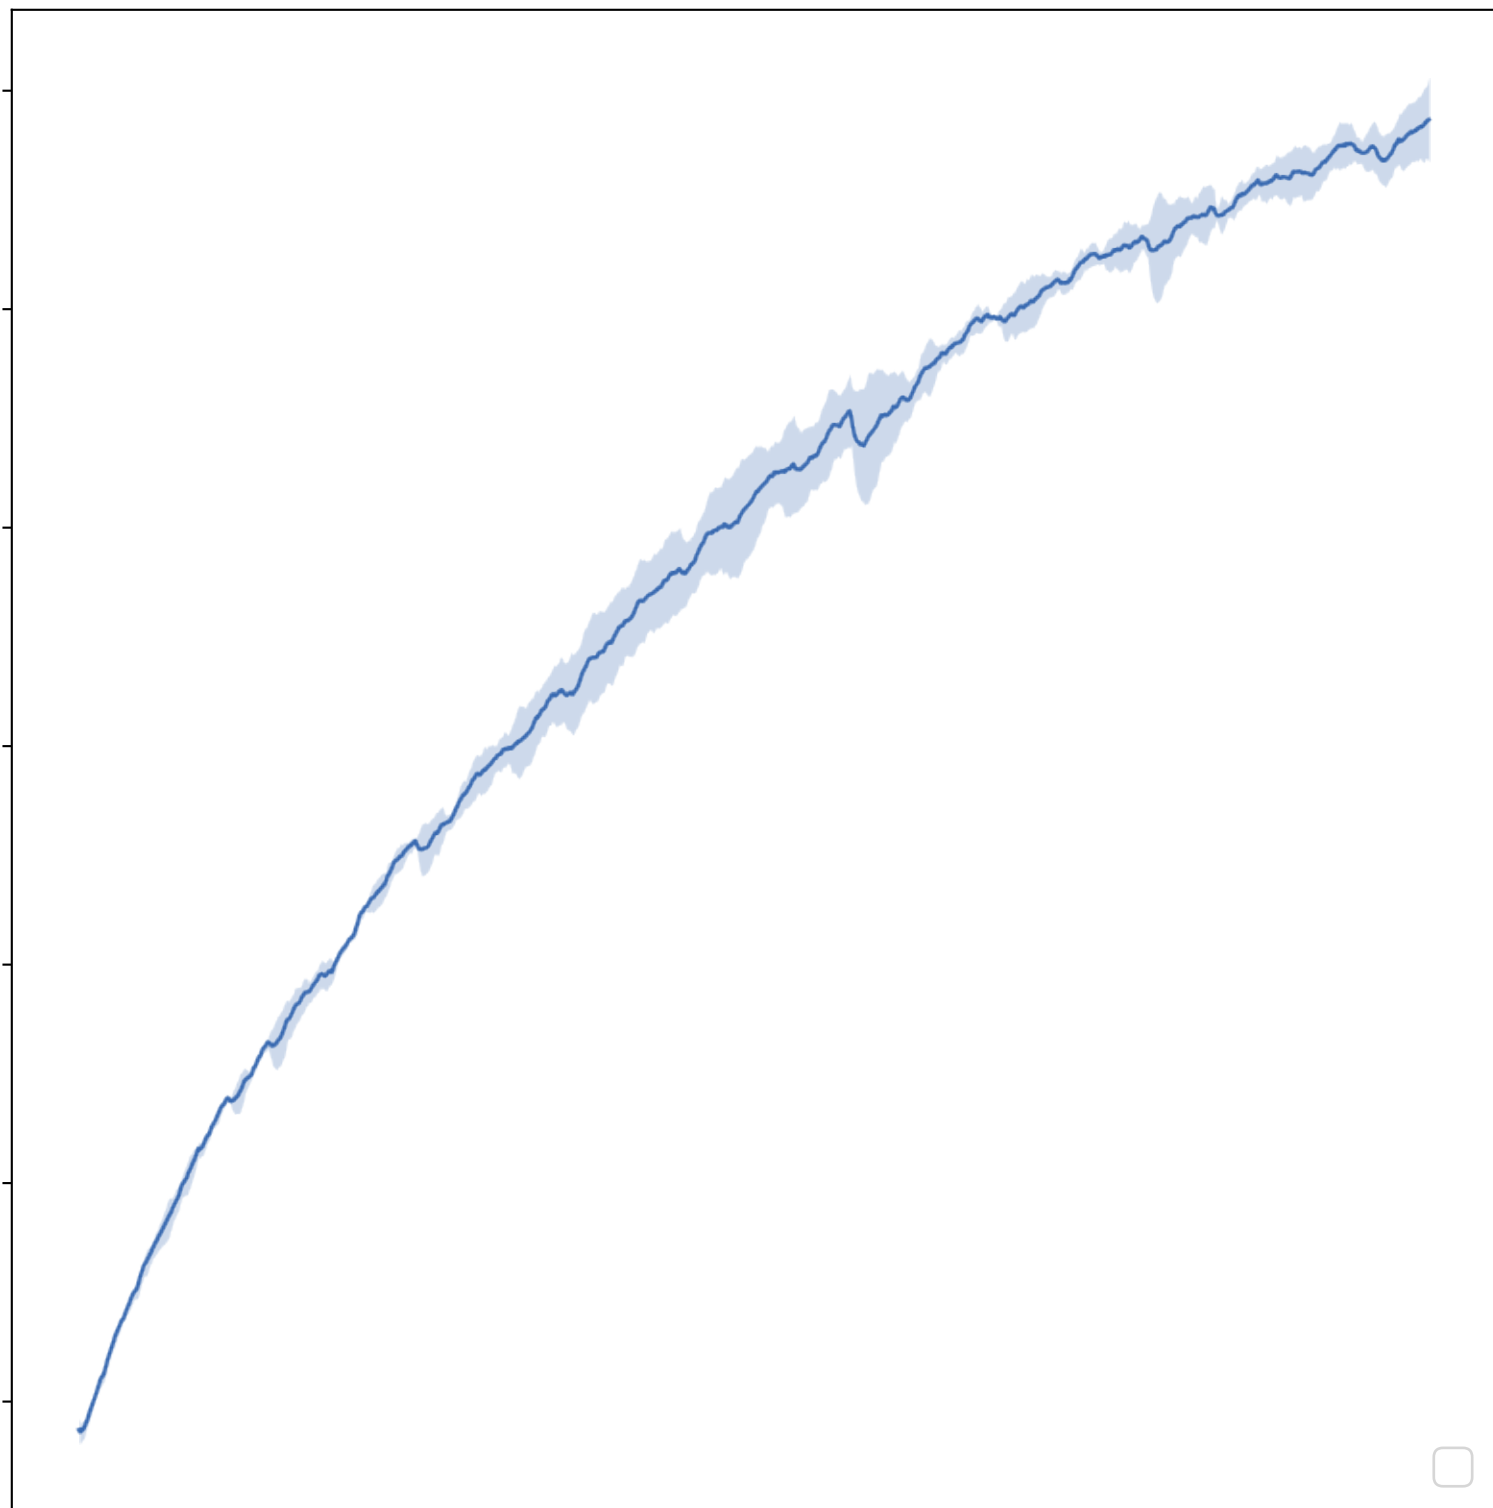

Supplement: supplementary_material [file attachment]

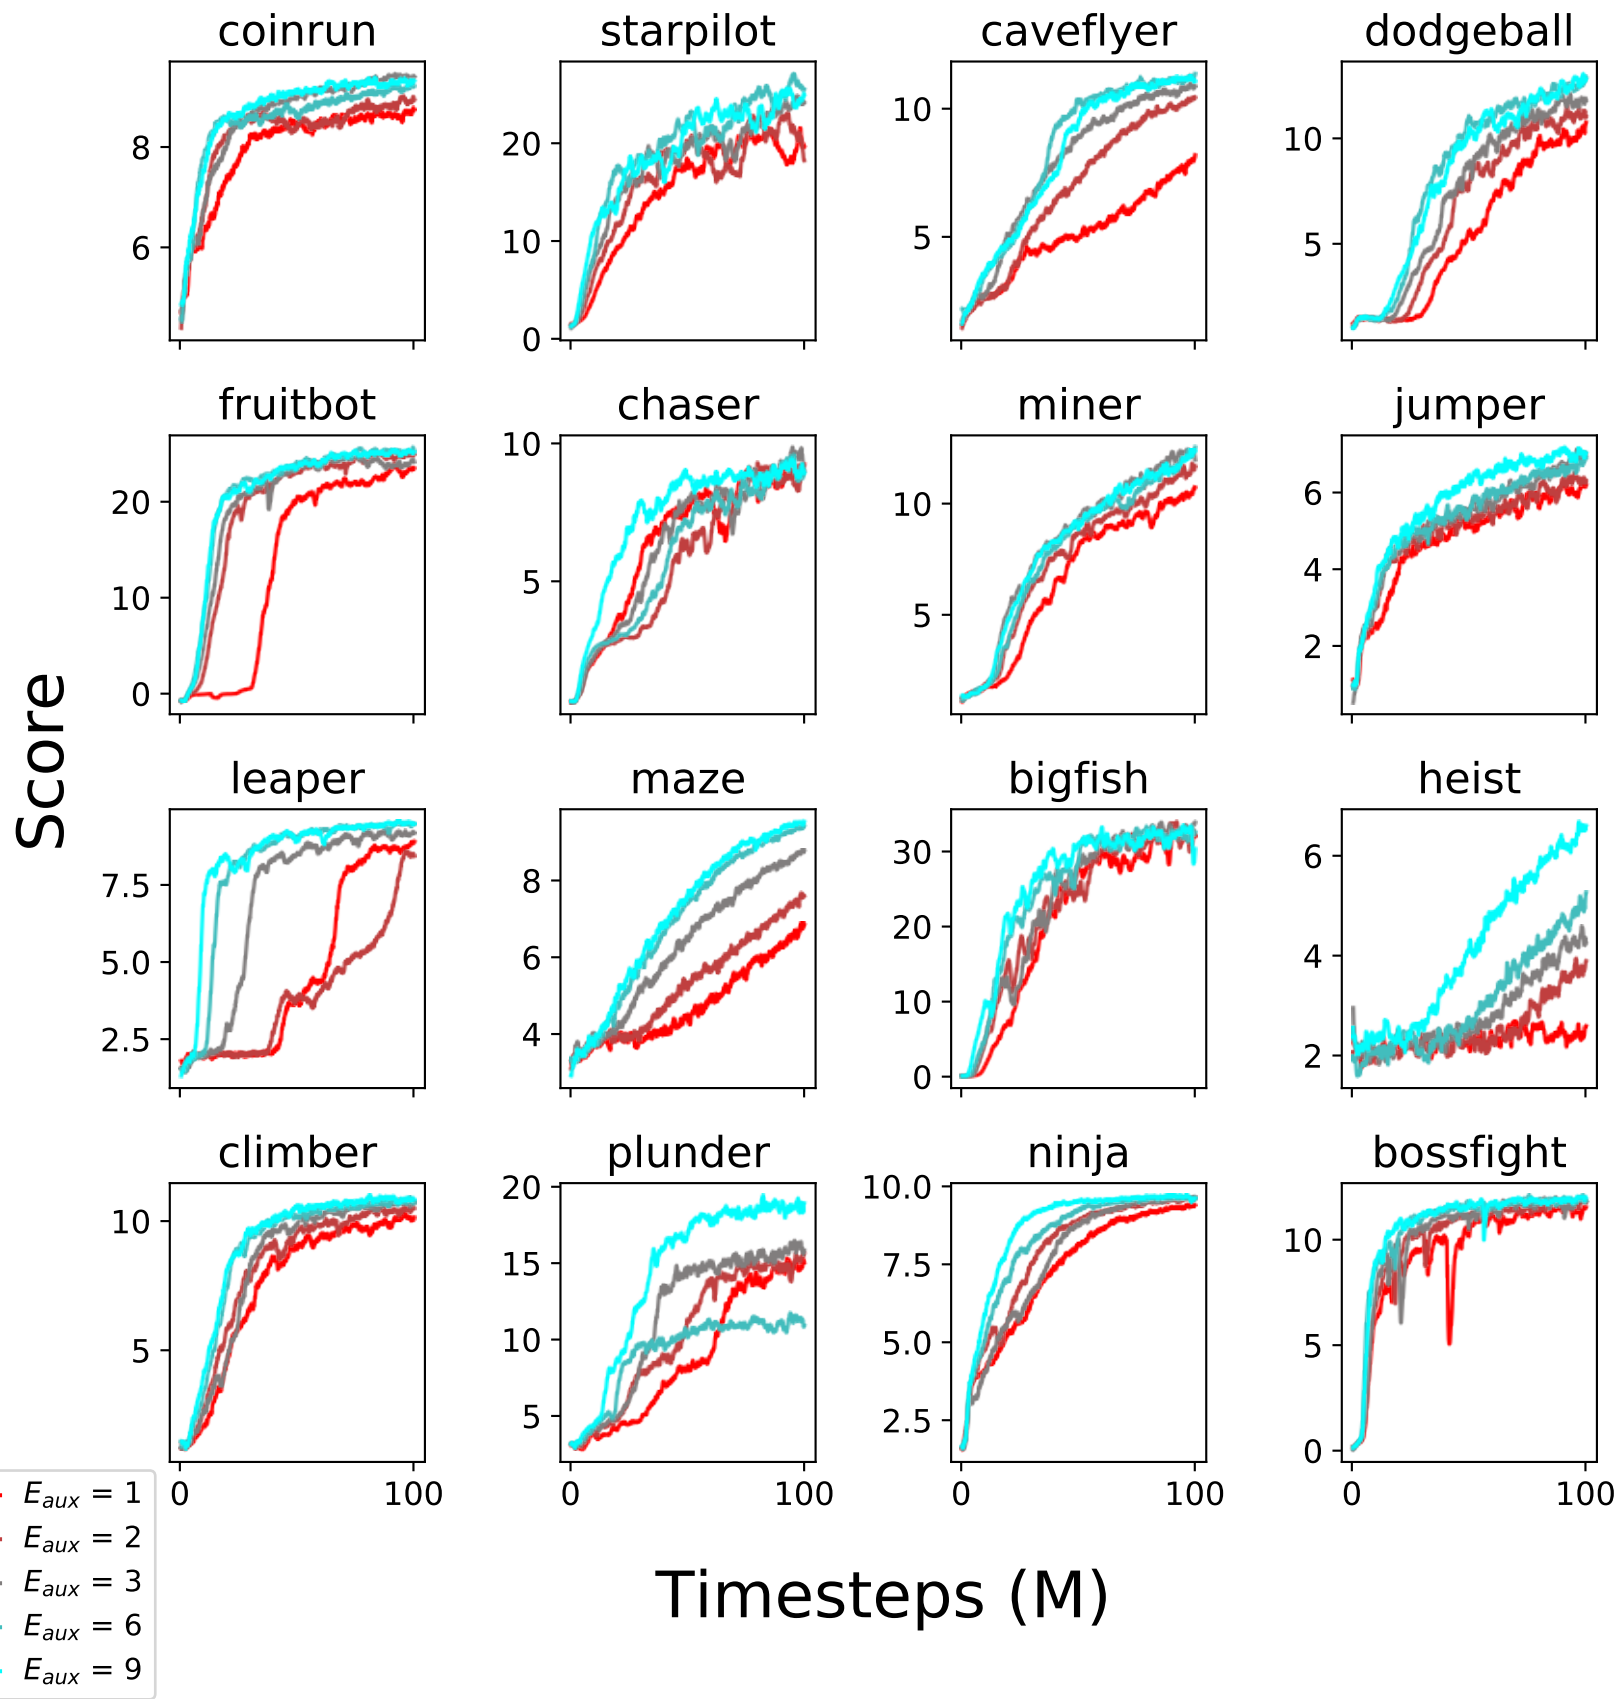

Supplement: supplementary_material [file attachment]

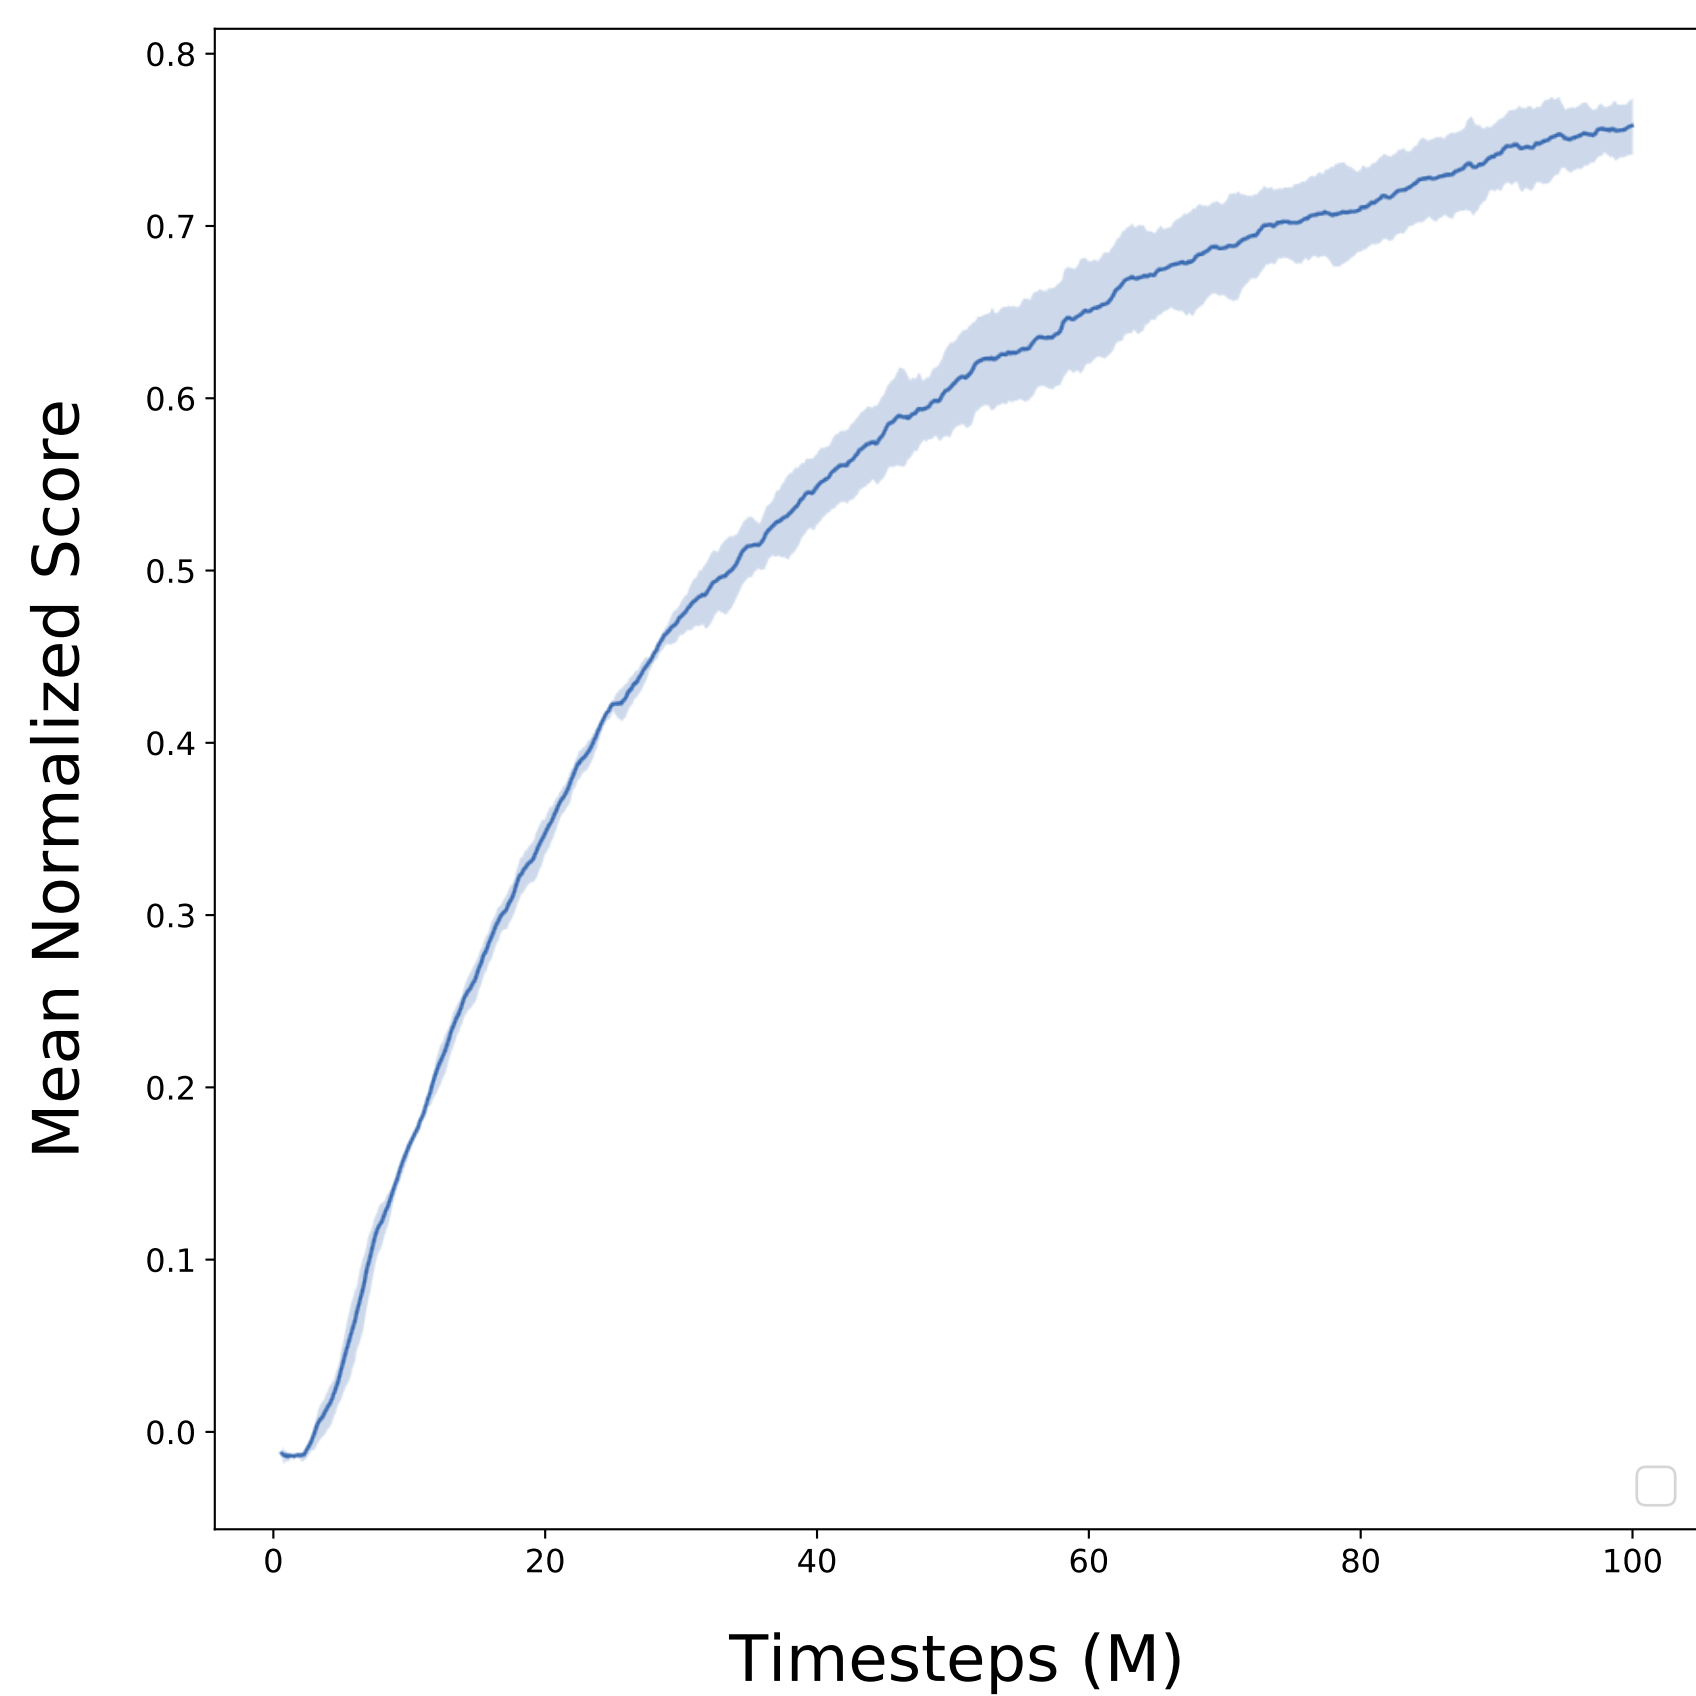

Supplement: supplementary_material [file attachment]

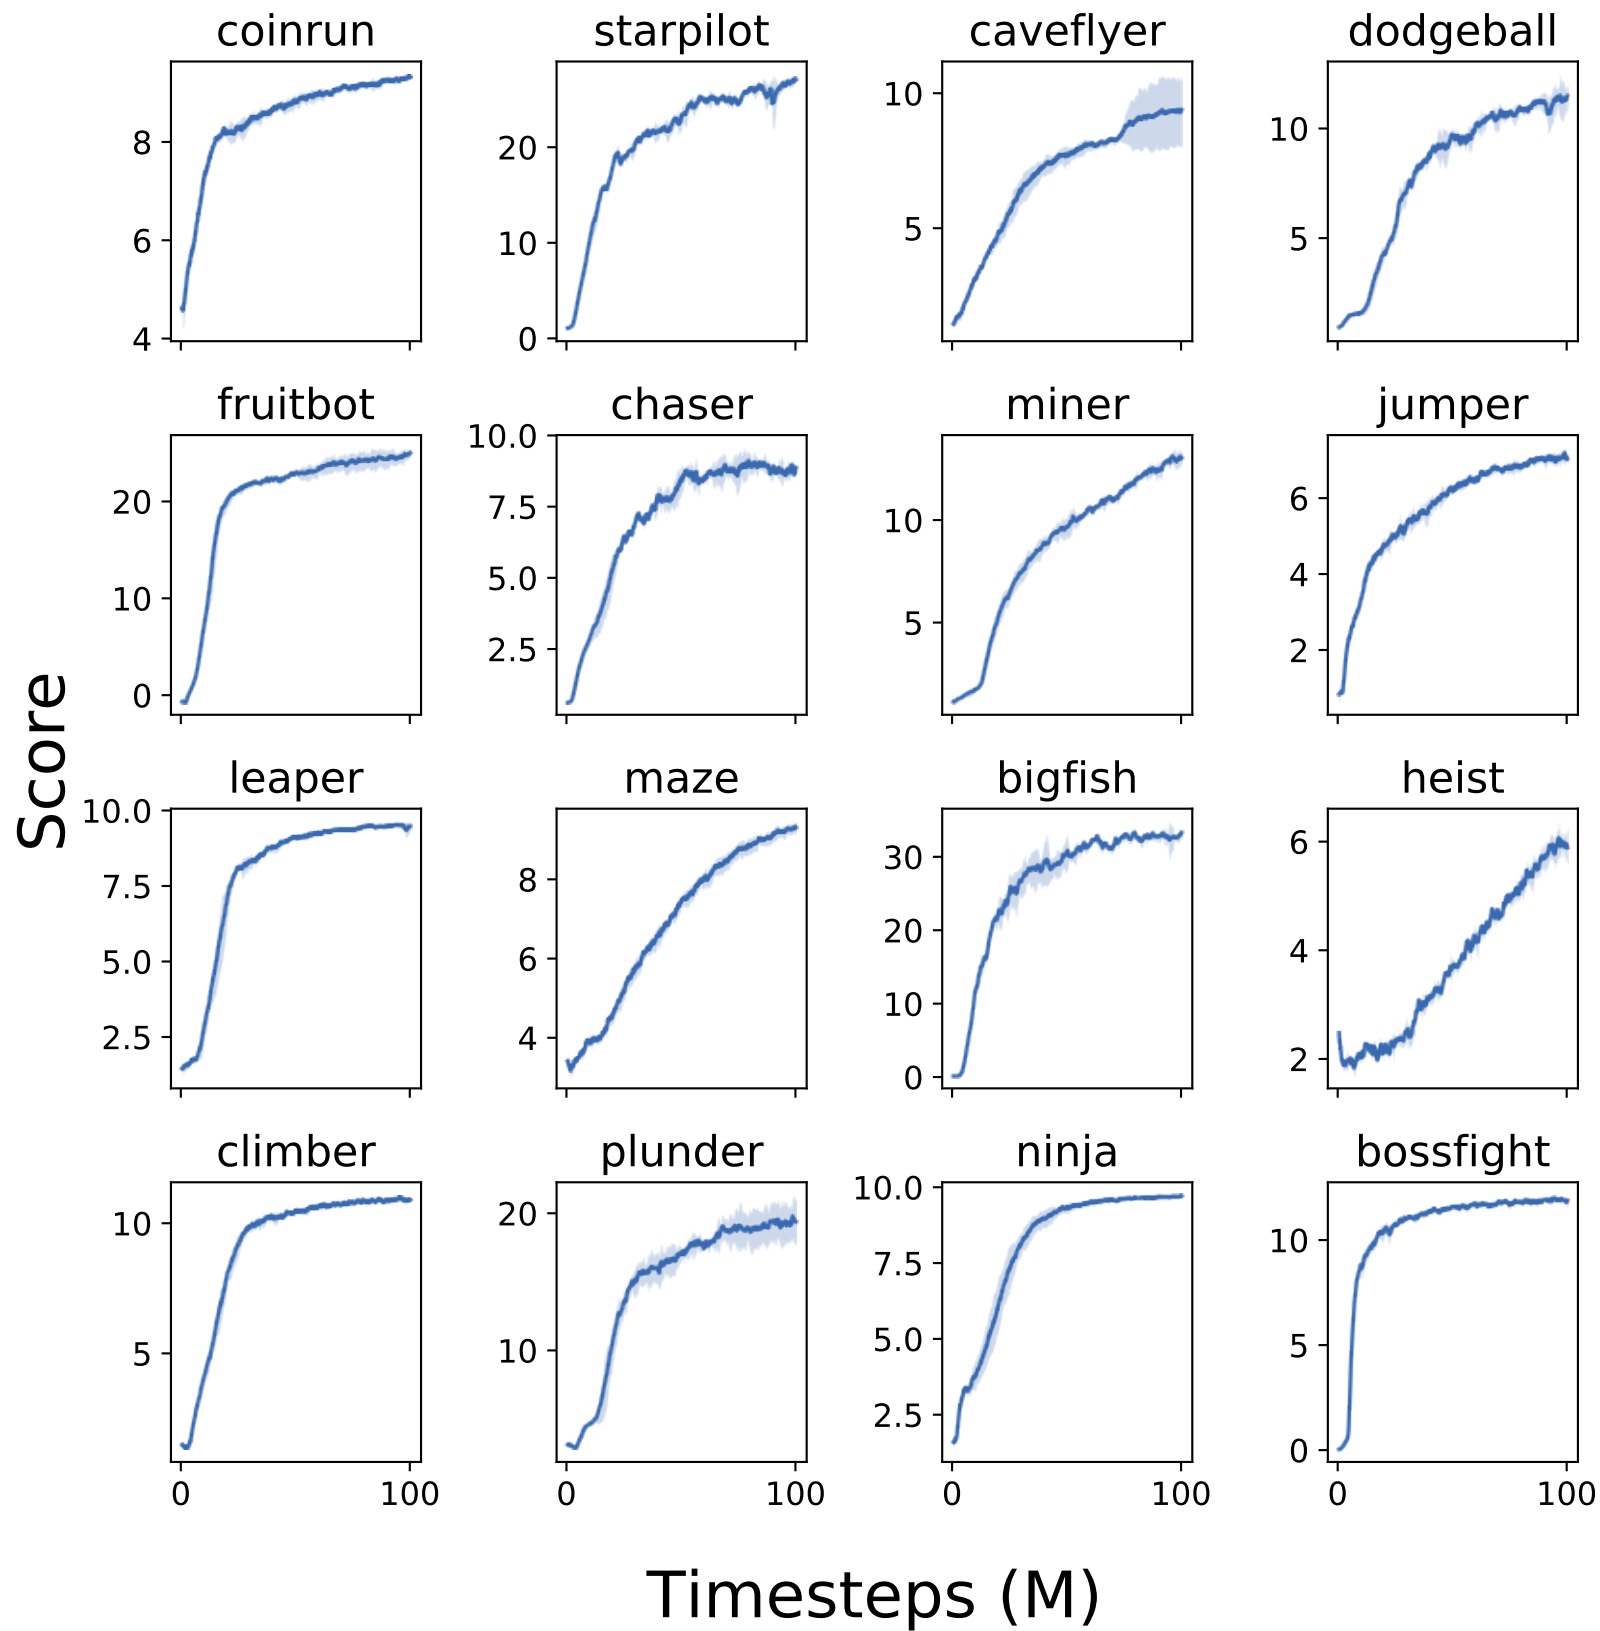

Supplement: supplementary_material [file attachment]

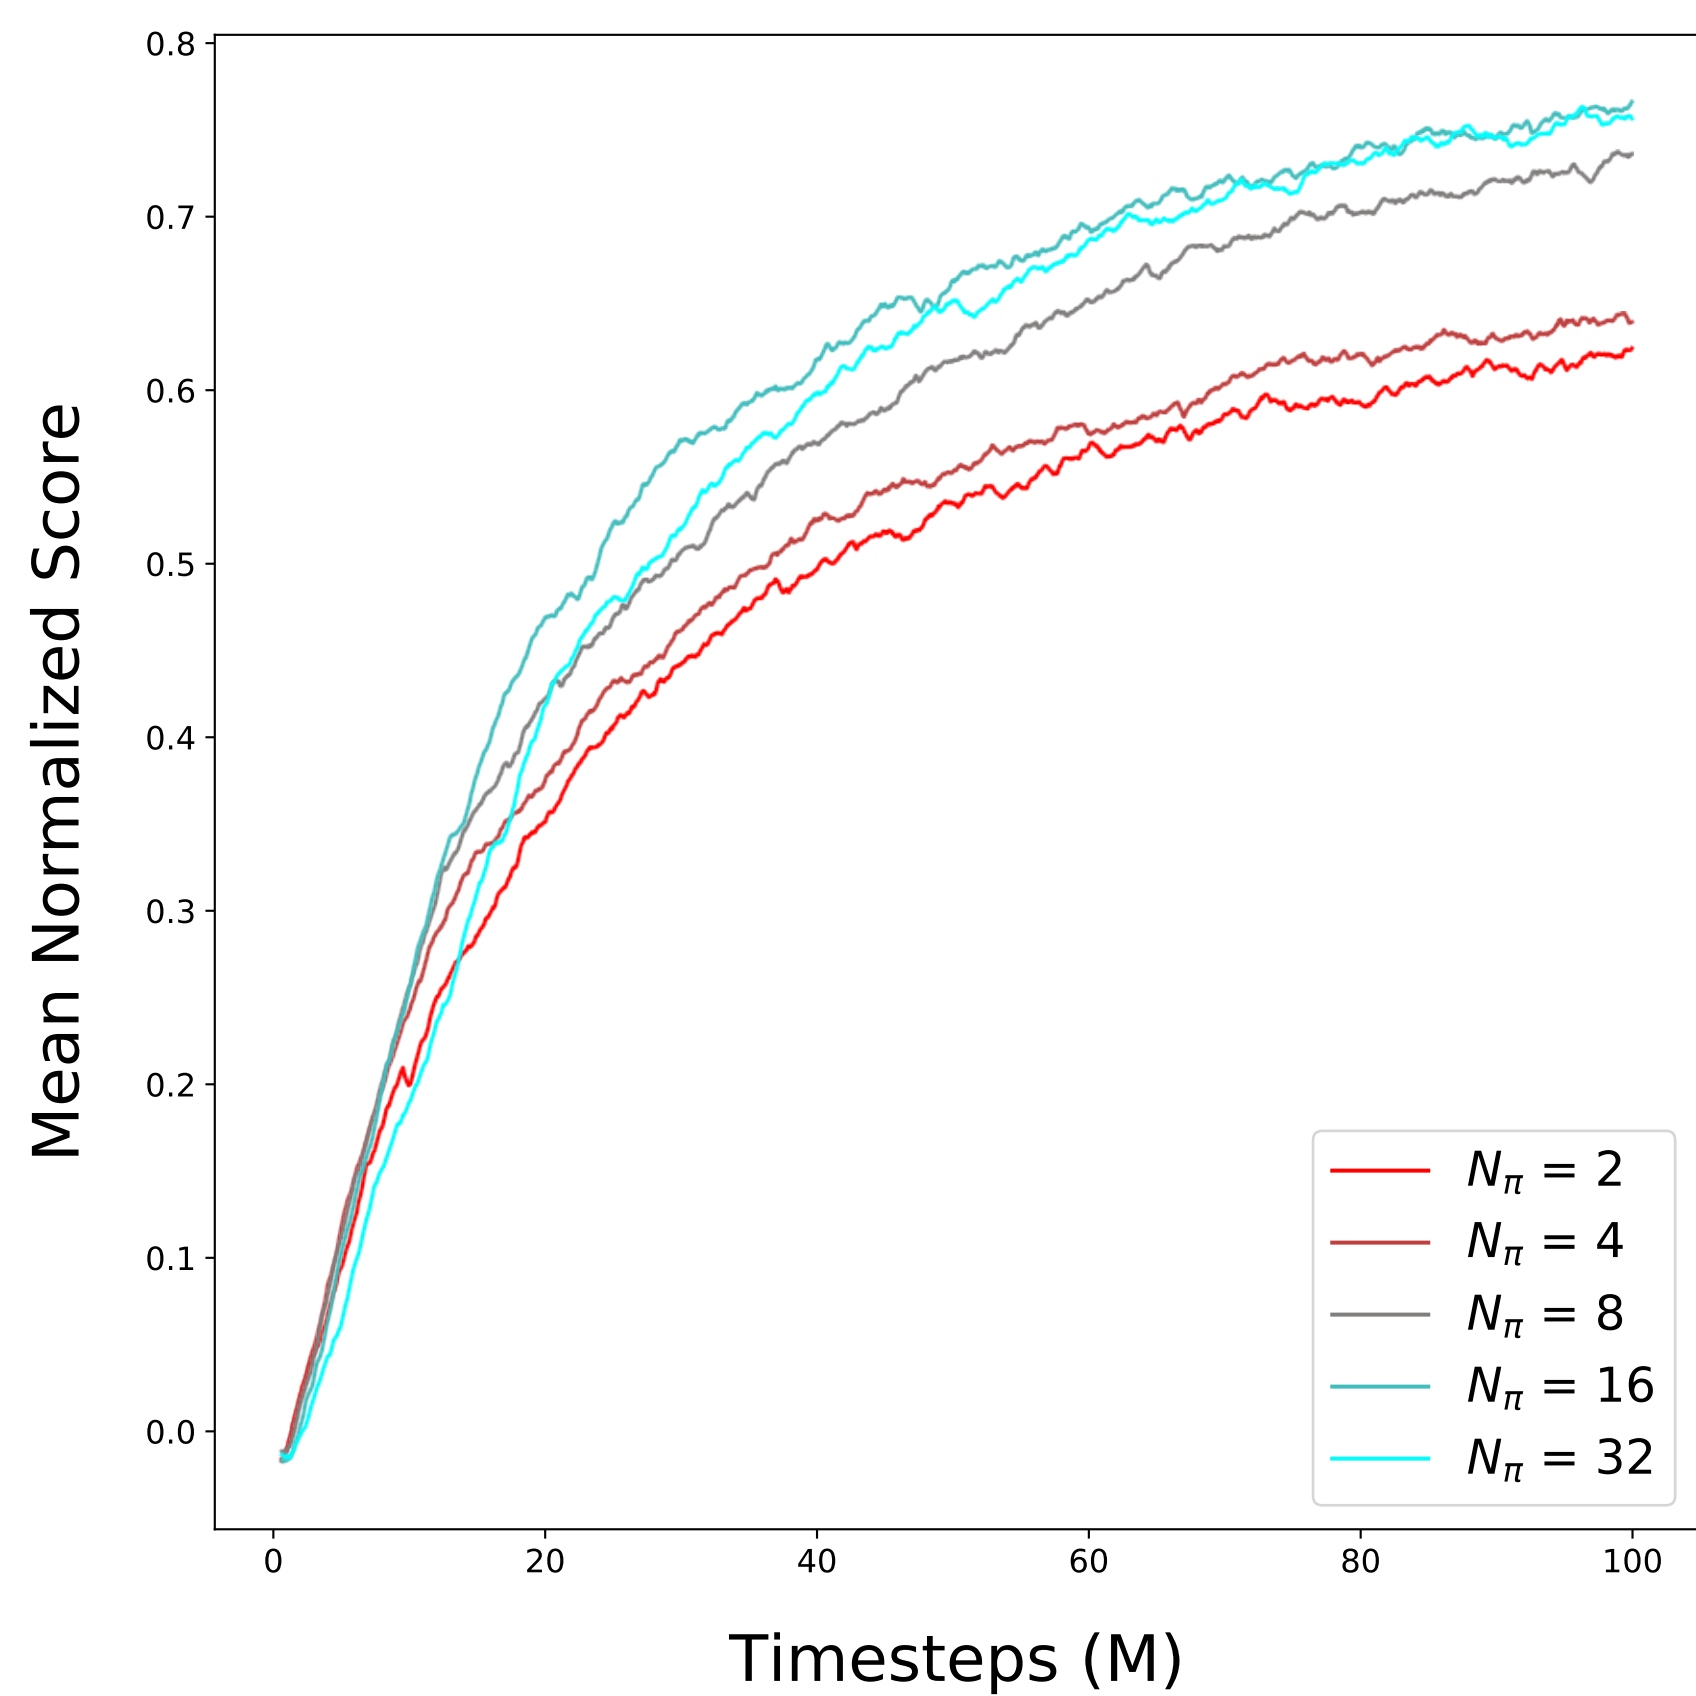

Supplement: supplementary_material [file attachment]
